# Supplementary material for: Embryonic Lethality Due to Arrested Cardiac Development in Psip1/Hdgfrp2 Double-Deficient Mice
Source: PubMed Central journal article supplement (PMC4569352; doi:10.1371/journal.pone.0137797), 2015-09-14
Supplement: pone.0137797.s002.pdf [file pone.0137797.s002.pdf]

**A**

| Gene        | Double KO vs. +/+g           |                | <i>Psip1</i> KO vs. +/+g     |                |
|-------------|------------------------------|----------------|------------------------------|----------------|
|             | log <sub>2</sub> fold change | <i>P</i> value | log <sub>2</sub> fold change | <i>P</i> value |
| Tgf-β1      | -1.33                        | 0.009          | -0.34                        | 0.5            |
| Smad1       | -2.2                         | <0.001         | -0.81                        | 0.11           |
| Integrin α1 | -1.28                        | 0.014          | -1.51                        | 0.004          |
| Integrin α9 | -1.64                        | 0.002          | -0.72                        | 0.16           |
| Pik3r5      | -1.53                        | 0.02           | -0.34                        | 0.74           |
| E2f5        | -2.06                        | <0.001         | 0.91                         | 0.08           |
| Caveolin 2  | -1.9                         | <0.001         | -1.3                         | 0.01           |

KO, knockout

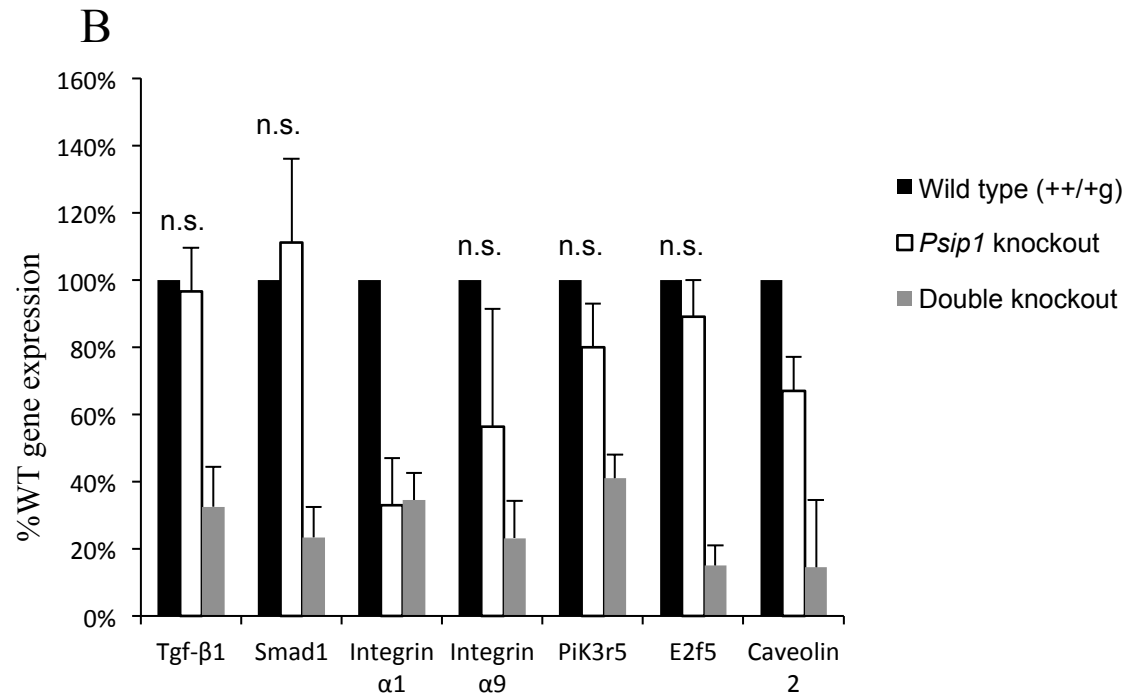

S2 Figure
