# Supplementary material for: Embryonic Lethality Due to Arrested Cardiac Development in Psip1/Hdgfrp2 Double-Deficient Mice
Source: PubMed Central journal article supplement (PMC4569352; doi:10.1371/journal.pone.0137797), 2015-09-14
Supplement: pone.0137797.s003.pdf [file pone.0137797.s003.pdf]

**A**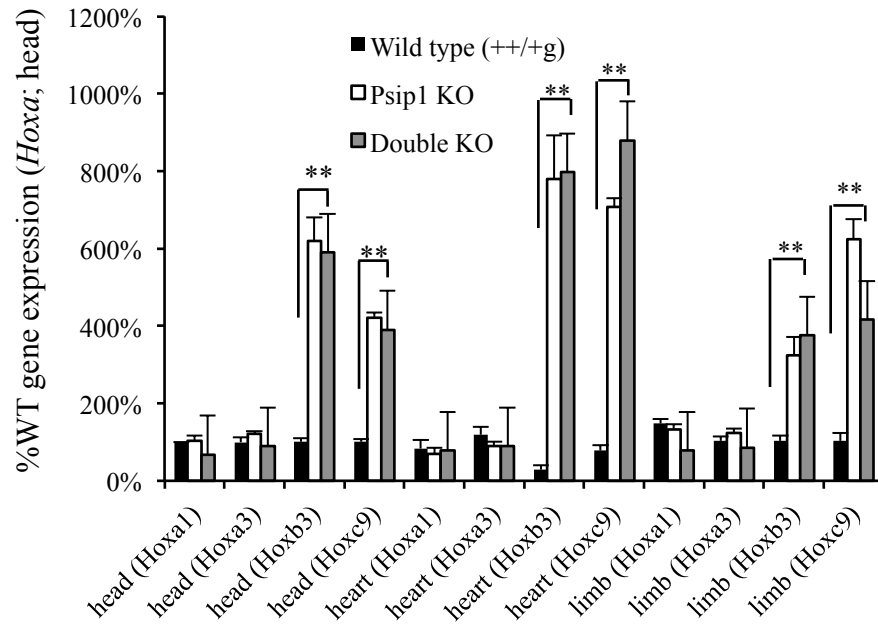**B**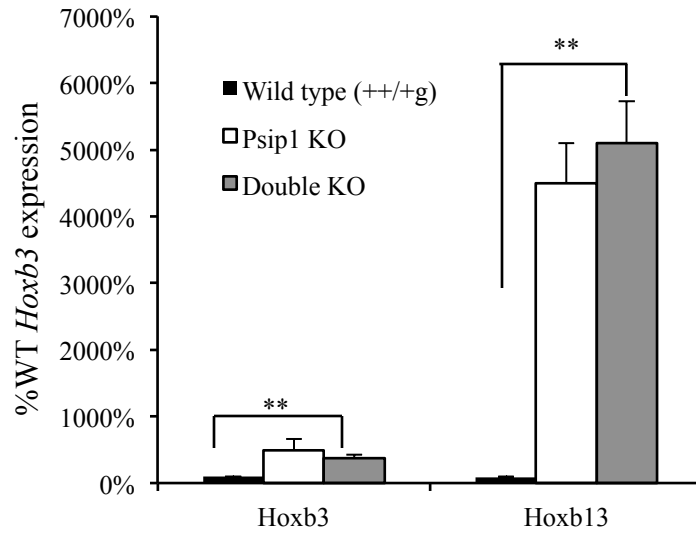

S3 Figure
