# Supplementary material for: Embryonic Lethality Due to Arrested Cardiac Development in Psip1/Hdgfrp2 Double-Deficient Mice
Source: PubMed Central journal article supplement (PMC4569352; doi:10.1371/journal.pone.0137797), 2015-09-14
Supplement: pone.0137797.s004.pdf [file pone.0137797.s004.pdf]

**A**

| <b>Double knockout vs. +/+tg control</b> | <b>P value</b>      |
|------------------------------------------|---------------------|
| Anatomical structure development         | $5 \times 10^{-17}$ |
| Cell differentiation                     | $6 \times 10^{-13}$ |
| Proteinaceous extracellular matrix       | $2 \times 10^{-12}$ |
| Extracellular region                     | $6 \times 10^{-10}$ |
| Cell adhesion                            | $2 \times 10^{-9}$  |

**B**

| <b><i>Psip1</i> knockout vs. +/+tg control</b>     | <b>P value</b>      |
|----------------------------------------------------|---------------------|
| Proteinaceous extracellular matrix                 | $6 \times 10^{-18}$ |
| Extracellular region                               | $3 \times 10^{-15}$ |
| Cell adhesion                                      | $2 \times 10^{-12}$ |
| Extracellular space                                | $9 \times 10^{-10}$ |
| Nucleic acid binding transcription factor activity | $7 \times 10^{-10}$ |

S4 Figure
