# Supplementary material for: Embryonic Lethality Due to Arrested Cardiac Development in Psip1/Hdgfrp2 Double-Deficient Mice
Source: PubMed Central journal article supplement (PMC4569352; doi:10.1371/journal.pone.0137797), 2015-09-14
Supplement: pone.0137797.s006.pdf [file pone.0137797.s006.pdf]

**S1 Table. Sequences of PCR primers.**

| <b>Primer</b> | <b>Sequence (5'-3')</b>          | <b>Purpose</b>            |
|---------------|----------------------------------|---------------------------|
| AE2331        | GAGATATCGAGGCAGAAAGAAGACTGGGATAG | <i>Psip1</i> genotyping   |
| AE2802        | GCATGGTGGCACAAATGGCAACTGGGTC     | <i>Psip1</i> genotyping   |
| AE2511        | TTCTGTTCTCATCCATGCTCTAGTG        | <i>Hdgrfp2</i> genotyping |
| AE2512        | GCTGTTTATTGGCTTGCTAACCATG        | <i>Hdgrfp2</i> genotyping |
| AE3747        | GTTGCGCAGCCTGAATGGCG             | <i>Hdgrfp2</i> genotyping |
| AE3748        | GCCGTCACTCCAACGCAGCA             | <i>Hdgrfp2</i> genotyping |
| AE6796        | TTGTCTAGAGAGCATGGAGGGCCATGTCAA   | <i>Sry</i> genotyping     |
| AE6797        | CCACTCCTCTGTGACACTTTAGCCCTCCGA   | <i>Sry</i> genotyping     |
| AE2624        | CCTCAAACATGACTCGCGATTTC          | <i>Psip1</i> expression   |
| AE2625        | GCTCCATCAGGAACTTCATCTAC          | <i>Psip1</i> expression   |
| AE3160        | TCCGACTCCC GCCTCTGACTT           | <i>Hdgrfp2</i> expression |
| AE3161        | CACGGCACCATCAGCAATGTC            | <i>Hdgrfp2</i> expression |
| AE2553        | TGAGTCGGAGAAGACCAGTGACC          | <i>Hdgrfp2</i> expression |
| AE2554        | AATCCGAGGCTGATGGCACCTTC          | <i>Hdgrfp2</i> expression |
| AE3664        | AGGTCCTGGCATCTTGTCATGG           | <i>Ppia</i> expression    |
| AE3665        | GGCTTCCACAATGTTTCATGCC           | <i>Ppia</i> expression    |
| AE6770        | CCTTCCCTCGGATGTGAGTC             | <i>Itga1</i> expression   |
| AE6771        | AAGTTCTCCCCGTATGGTAAGA           | <i>Itga1</i> expression   |
| AE6772        | CTCCCGTGGCTTCTAGTGC              | <i>Tgfb1</i> expression   |
| AE6773        | GCCTTAGTTTGGACAGGATCTG           | <i>Tgfb1</i> expression   |
| AE6774        | GCTTCGTGAAGGGTTGGGG              | <i>Smad1</i> expression   |
| AE6775        | CGGATGAAATAGGATTGTGGGG           | <i>Smad1</i> expression   |
| AE6776        | AAGTGTCGTGTCCATACCAAC            | <i>Itga9</i> expression   |
| AE6777        | GGTCTGCTTCGTAGTAGATGTTC          | <i>Itga9</i> expression   |
| AE6778        | TGCTCTGGAGCGATGCTTG              | <i>Pik3r5</i> expression  |
| AE6779        | ACCTCTTGGGTCTTTTGTAGGA           | <i>Pik3r5</i> expression  |
| AE6780        | CCACCAAATTCGTGTCGTTGC            | <i>E2f5</i> expression    |
| AE6781        | AGCACCTACACCCTTCCACT             | <i>E2f5</i> expression    |
| AE6782        | TCACCAGCTCAACTCTCATCT            | <i>Cav2</i> expression    |
| AE6783        | GCCAGAAATACGGTCAGGAACT           | <i>Cav2</i> expression    |
| AE6784        | ATGGGTACTAGACTTGAGGCAA           | <i>Slfn2</i> expression   |
| AE6785        | AGCTTAGCATATTTGGCTTCCAG          | <i>Slfn2</i> expression   |
| AE6786        | ACAGA ACTTCAGTGCGCCTTACA         | <i>Hoxa1</i> expression   |
| AE6787        | AGACCC GGGAGCGACAGGCTTCTTG       | <i>Hoxa1</i> expression   |
| AE6788        | CCTGGATGAAAGAGTCTCGACAA          | <i>Hoxa3</i> expression   |
| AE6789        | CAG GCCAGCGCAGCTTTCG             | <i>Hoxa3</i> expression   |
| AE6790        | TCACCCAGCGATGCAGAA               | <i>Hoxb3</i> expression   |
| AE6791        | CGAGGAATAGCCTCCGAAGA             | <i>Hoxb3</i> expression   |
| AE6792        | GCTGATGCCTGCTGTCAACTAT           | <i>Hoxb13</i> expression  |
| AE6793        | ATTGCTTTGGCGGCTCC                | <i>Hoxb13</i> expression  |
| AE6794        | TCATCCTTCGATTCTGAAACCA           | <i>Hoxc9</i> expression   |
| AE6795        | GGTGGCCCCGGGTTCTC                | <i>Hoxc9</i> expression   |
