# Supplementary material for: Embryonic Lethality Due to Arrested Cardiac Development in Psip1/Hdgfrp2 Double-Deficient Mice
Source: PubMed Central journal article supplement (PMC4569352; doi:10.1371/journal.pone.0137797), 2015-09-14
Supplement: pone.0137797.s007.pdf [file pone.0137797.s007.pdf]

**S2 Table. Top 20 differentially expressed genes comparing *Psip1* knockout to control +/+g tissue.**

| <b>Symbol</b> | <b>Gene name</b>                                                    | <b>log2 fold change</b> |
|---------------|---------------------------------------------------------------------|-------------------------|
| Xist          | Inactive X specific transcripts                                     | 11.13                   |
| Sprr2k        | Small proline-rich protein 2K                                       | 8.50                    |
| Hoxb13        | Homeobox B13                                                        | 8.29                    |
| AI662270      | Expressed sequence AI662270                                         | 8.08                    |
| Slfn2         | Schlafen 2                                                          | 5.60                    |
| Trank1        | Tetratricopeptide repeat and ankyrin repeat containing 1            | 4.87                    |
| Hoxc9         | Homeobox C9                                                         | 4.37                    |
| Sp100         | Nuclear antigen Sp100                                               | 4.09                    |
| Ddx3y         | DEAD (Asp-Glu-Ala-Asp) box polypeptide 3                            | -11.00                  |
| Kdm5d         | Lysine (K)-specific demethylase 5D                                  | -9.21                   |
| Uty           | Ubiquitously transcribed tetratricopeptide repeat gene              | -8.90                   |
| Eif2s3y       | Eukaryotic translation initiation factor 2                          | -8.64                   |
| Prkcq         | Protein kinase C                                                    | -6.01                   |
| Alx1          | ALX homeobox 1                                                      | -4.66                   |
| Enpep         | Glutamyl aminopeptidase                                             | -4.48                   |
| Chrdl1        | Chordin-like 1                                                      | -4.28                   |
| Cldn1         | Claudin 1                                                           | -4.19                   |
| Rspo1         | R-spondin homolog ( <i>Xenopus laevis</i> )                         | -4.09                   |
| Tmtc1         | Transmembrane and tetratricopeptide repeat containing 1             | -3.98                   |
| Gfra2         | Glial cell line derived neurotrophic factor family receptor alpha 2 | -3.83                   |
