# Supplementary material for: Embryonic Lethality Due to Arrested Cardiac Development in Psip1/Hdgfrp2 Double-Deficient Mice
Source: PubMed Central journal article supplement (PMC4569352; doi:10.1371/journal.pone.0137797), 2015-09-14
Supplement: pone.0137797.s008.pdf [file pone.0137797.s008.pdf]

**S3 Table. Top 20 differentially expressed genes comparing *Psip1/Hdgfrp2* knockout to control +/+g tissue.**

| <b>Symbol</b> | <b>Gene name</b>                                        | <b>log2 fold change</b> |
|---------------|---------------------------------------------------------|-------------------------|
| Hoxb13        | Homeobox B13                                            | 8.55                    |
| Gda           | Guanine deaminase                                       | 4.98                    |
| Sult4a1       | Sulfotransferase family 4A,member 1                     | 4.58                    |
| Zic1          | Zinc finger protein of the cerebellum 1                 | 4.24                    |
| Slfn2         | Schlafen 2                                              | 4.17                    |
| Cntn1         | Contactin 1                                             | 3.78                    |
| Krt19         | Keratin 19                                              | 3.61                    |
| Sp100         | Nuclear antigen Sp100                                   | 3.50                    |
| Slc26a7       | Solute carrier family 26, member 7                      | -4.91                   |
| Sorbs2        | Sorbin and SH3 domain containing 2                      | -3.96                   |
| Chrdl1        | Chordin-like 1                                          | -3.92                   |
| Tmtc1         | Transmembrane and tetratricopeptide repeat containing 1 | -3.71                   |
| Perp          | PERP, TP53 apoptosis effector                           | -3.69                   |
| Alx1          | ALX homeobox 1                                          | -3.59                   |
| Prkcq         | Protein kinase C, theta                                 | -3.57                   |
| Enpep         | Glutamyl aminopeptidase                                 | -3.55                   |
| Pax9          | Paired box 9                                            | -3.49                   |
| Rspo1         | R-spondin homolog ( <i>Xenopus laevis</i> )             | -3.47                   |
| Psip1         | PC4 and SFRS1 interacting protein 1                     | -3.40                   |
| Clec11a       | C-type lectin domain family 11, member a                | -3.23                   |
