# Supplementary material for: Embryonic Lethality Due to Arrested Cardiac Development in Psip1/Hdgfrp2 Double-Deficient Mice
Source: PubMed Central journal article supplement (PMC4569352; doi:10.1371/journal.pone.0137797), 2015-09-14
Supplement: pone.0137797.s009.pdf [file pone.0137797.s009.pdf]

**S4 Table. Top 20 differentially expressed genes comparing *Psip1* knockout to *Psip1/Hdgfrp2* knockout tissue.**

| <b>Symbol</b> | <b>Gene name</b>                                                                | <b>log2 fold change</b> |
|---------------|---------------------------------------------------------------------------------|-------------------------|
| Xist          | Inactive X specific transcripts                                                 | 12.56                   |
| Slc26a7       | Solute carrier family 26, member 7                                              | 4.31                    |
| Hdgfrp2       | Hepatoma-derived growth factor related protein 2                                | 4.23                    |
| AI662270      | Expressed sequence AI662270                                                     | 3.70                    |
| Trp63         | Transformation related protein 63                                               | 3.04                    |
| E2f5          | E2F transcription factor 5                                                      | 2.97                    |
| C1qtnf7       | C1q and tumor necrosis factor related protein 7                                 | 2.40                    |
| Chodl         | Chondrolectin                                                                   | 2.37                    |
| Ddx3y         | DEAD (Asp-Glu-Ala-Asp) box polypeptide 3, Y-linked                              | -10.77                  |
| Kdm5d         | Lysine (K)-specific demethylase 5D                                              | -9.33                   |
| Uty           | Ubiquitously transcribed tetratricopeptide repeat gene, Y chromosome            | -8.75                   |
| Eif2s3y       | Eukaryotic translation initiation factor 2, subunit 3, structural gene Y-linked | -8.74                   |
| Clec3b        | C-type lectin domain family 3, member b                                         | -4.27                   |
| Serpina3n     | Serine (or cysteine) peptidase inhibitor, clade A, member 3N                    | -3.52                   |
| Mdk           | Midkine                                                                         | -3.36                   |
| Comp          | Cartilage oligomeric matrix protein                                             | -2.96                   |
| Clec14a       | C-type lectin domain family 14, member a                                        | -2.72                   |
| Gda           | Guanine deaminase                                                               | -2.64                   |
| Scg2          | Secretogranin II                                                                | -2.52                   |
| Fgl2          | Fibrinogen-like protein 2                                                       | -2.24                   |
