# Supplementary material for: Embryonic Lethality Due to Arrested Cardiac Development in Psip1/Hdgfrp2 Double-Deficient Mice
Source: PubMed Central journal article supplement (PMC4569352; doi:10.1371/journal.pone.0137797), 2015-09-14
Supplement: pone.0137797.s010.pdf [file pone.0137797.s010.pdf]

**S5 Table. Gene expression profiles of LEDGF interacting proteins vs. ++/+g control.**

| <b>Gene</b>    | <b>Interactor</b> | <b>Comparator</b> | <b>Log<sub>2</sub> fold change</b> | <b>P value</b> |
|----------------|-------------------|-------------------|------------------------------------|----------------|
| <i>Jpo2</i>    | LEDGF/p75         | Psip1 KO          | -0.07                              | 0.89           |
|                |                   | Double KO         | 0.28                               | 0.58           |
| <i>PogZ</i>    | LEDGF/p75         | Psip1 KO          | 0.02                               | 0.98           |
|                |                   | Double KO         | -0.02                              | 0.97           |
| <i>Men1</i>    | LEDGF/p75         | Psip1 KO          | 0.06                               | 0.91           |
|                |                   | Double KO         | 0.07                               | 0.89           |
| <i>CtlP</i>    | LEDGF/p75         | Psip1 KO          | -0.07                              | 0.89           |
|                |                   | Double KO         | -0.06                              | 0.91           |
| <i>Mll1</i>    | LEDGF/p75         | Psip1 KO          | 0.14                               | 0.78           |
|                |                   | Double KO         | -0.05                              | 0.91           |
| <i>Dbf4</i>    | LEDGF/p75         | Psip1 KO          | 0.11                               | 0.83           |
|                |                   | Double KO         | -0.06                              | 0.90           |
| <i>Tox4</i>    | LEDGF/p75         | Psip1 KO          | 0.07                               | 0.90           |
|                |                   | Double KO         | 0.07                               | 0.89           |
| <i>Nova1</i>   | LEDGF/p75         | Psip1 KO          | 1.53                               | 0.004          |
|                |                   | Double KO         | 1.81                               | 0.0006         |
| <i>Mcm7</i>    | LEDGF/p75         | Psip1 KO          | 0.10                               | 0.84           |
|                |                   | Double KO         | 0.12                               | 0.81           |
| <i>C3orf59</i> | LEDGF/p75         | Psip1 KO          | -0.09                              | 0.86           |
|                |                   | Double KO         | 0.05                               | 0.93           |
| <i>Map1a</i>   | LEDGF/p75         | Psip1 KO          | -0.50                              | 0.32           |
|                |                   | Double KO         | -0.30                              | 0.56           |
| <i>Iws1</i>    | LEDGF/p75         | Psip1 KO          | 0.20                               | 0.70           |
|                |                   | Double KO         | 0.20                               | 0.67           |
| <i>Sfrs1</i>   | LEDGF/p52         | Psip1 KO          | 0.23                               | 0.64           |
|                |                   | Double KO         | 0.20                               | 0.69           |

KO, knockout
