# Supplementary material for: Embryonic Lethality Due to Arrested Cardiac Development in Psip1/Hdgfrp2 Double-Deficient Mice
Source: PubMed Central journal article supplement (PMC4569352; doi:10.1371/journal.pone.0137797), 2015-09-14
Supplement: pone.0137797.s011.pdf [file pone.0137797.s011.pdf]

**S6 Table. Differential expression of *Hox* genes in pairwise tissue comparisons.**

| <b>Gene</b>   | <b><i>Psip1</i> KO vs.<br/>++/+g<br/>log<sub>2</sub> fold change</b> | <b><i>P</i> value</b> | <b>Double KO vs.<br/>++/+g<br/>(log<sub>2</sub> fold change)</b> | <b><i>P</i> value</b> |
|---------------|----------------------------------------------------------------------|-----------------------|------------------------------------------------------------------|-----------------------|
| <i>Hoxa1</i>  | n.d.                                                                 | n.a.                  | n.d.                                                             | n.a.                  |
| <i>Hoxa2</i>  | 0.72                                                                 | 0.25                  | 0.32                                                             | 0.62                  |
| <i>Hoxa3</i>  | 0.57                                                                 | 0.30                  | 0.63                                                             | 0.26                  |
| <i>Hoxa4</i>  | 0.38                                                                 | 0.50                  | 0.39                                                             | 0.50                  |
| <i>Hoxa5</i>  | 0.84                                                                 | 0.10                  | 0.52                                                             | 0.32                  |
| <i>Hoxa6</i>  | n.d.                                                                 | n.a.                  | 0.12                                                             | 0.45                  |
| <i>Hoxa7</i>  | 0.90                                                                 | 0.08                  | 0.99                                                             | 0.06                  |
| <i>Hoxa9</i>  | 1.15                                                                 | 0.06                  | 1.09                                                             | 0.04                  |
| <i>Hoxa10</i> | 0.80                                                                 | 0.10                  | 0.79                                                             | 0.12                  |
| <i>Hoxa11</i> | 1.40                                                                 | 0.06                  | 1.40                                                             | 0.07                  |
| <i>Hoxa13</i> | 0.19                                                                 | 0.70                  | 0.35                                                             | 0.50                  |
| <i>Hoxb3</i>  | 4.08                                                                 | 2.2×10 <sup>-9</sup>  | 3.04                                                             | 9.0×10 <sup>-6</sup>  |
| <i>Hoxb4</i>  | 1.88                                                                 | 6.9×10 <sup>-4</sup>  | 0.23                                                             | 0.65                  |
| <i>Hoxb5</i>  | 2.65                                                                 | 8.3×10 <sup>-6</sup>  | 2.07                                                             | 4.8×10 <sup>-4</sup>  |
| <i>Hoxb6</i>  | 2.86                                                                 | 4.1×10 <sup>-7</sup>  | 2.18                                                             | 8.5×10 <sup>-5</sup>  |
| <i>Hoxb7</i>  | 2.27                                                                 | 4.6×10 <sup>-5</sup>  | 2.71                                                             | 1.4×10 <sup>-6</sup>  |
| <i>Hoxb8</i>  | 3.60                                                                 | 8.1×10 <sup>-10</sup> | 2.75                                                             | 1.6×10 <sup>-6</sup>  |
| <i>Hoxb9</i>  | 3.07                                                                 | 2.1×10 <sup>-8</sup>  | 2.34                                                             | 1.1×10 <sup>-5</sup>  |
| <i>Hoxb13</i> | 8.29                                                                 | 9.1×10 <sup>-13</sup> | 8.55                                                             | 9.7×10 <sup>-14</sup> |
| <i>Hoxc6</i>  | 2.37                                                                 | 1.4×10 <sup>-5</sup>  | 0.29                                                             | 0.57                  |
| <i>Hoxc8</i>  | 2.46                                                                 | 7.2×10 <sup>-6</sup>  | 1.49                                                             | 0.53                  |
| <i>Hoxc9</i>  | 4.37                                                                 | 4.9×10 <sup>-13</sup> | 2.83                                                             | 8.9×10 <sup>-7</sup>  |
| <i>Hoxd1</i>  | n.d.                                                                 | n.a.                  | n.d.                                                             | n.a.                  |
| <i>Hoxd3</i>  | n.d.                                                                 | n.a.                  | n.d.                                                             | n.a.                  |
| <i>Hoxd4</i>  | n.d.                                                                 | n.a.                  | n.d.                                                             | n.a.                  |
| <i>Hoxd8</i>  | 1.29                                                                 | 0.012                 | 0.83                                                             | 0.10                  |
| <i>Hoxd9</i>  | 1.48                                                                 | 0.005                 | 1.50                                                             | 0.004                 |
| <i>Hoxd10</i> | 1.30                                                                 | 0.01                  | 1.60                                                             | 0.002                 |
| <i>Hoxd11</i> | 1.40                                                                 | 0.005                 | 1.60                                                             | 0.002                 |
| <i>Hoxd12</i> | 2.60                                                                 | 5.0×10 <sup>-5</sup>  | 2.26                                                             | 2.6×10 <sup>-5</sup>  |
| <i>Hoxd13</i> | 0.86                                                                 | 0.08                  | 1.32                                                             | 0.09                  |

KO, knockout; n.d., not detected; n.a., not applicable
