# Supplementary material for: Embryonic Lethality Due to Arrested Cardiac Development in Psip1/Hdgfrp2 Double-Deficient Mice
Source: PubMed Central journal article supplement (PMC4569352; doi:10.1371/journal.pone.0137797), 2015-09-14
Supplement: pone.0137797.s012.pdf [file pone.0137797.s012.pdf]

**S7 Table. Alternatively spliced genes in double knockout versus control ++/+g samples.**

| <b>Transcript</b> | <b>Associated phenotype</b> |
|-------------------|-----------------------------|
| Tpm1              | MXE                         |
| H2afy             | MXE                         |
| Fn1               | SE                          |
| Sptan1            | SE                          |
| Rbm4              | SE                          |

MXE, mutually exclusive exon; SE, skipped exon
